# Supplementary material
Source: PubMed Central journal article supplement (PMC2075222)
Supplement: jphysiol_2006.123059_1.pdf [file jphysiol_2006.123059_1.pdf]

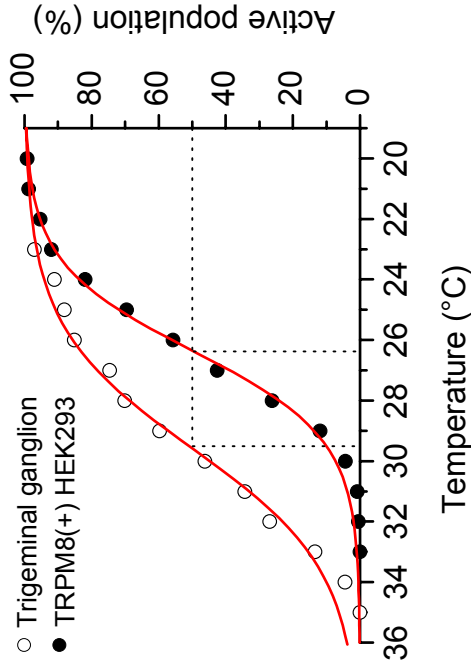

Supplementary Figure. Shown are the active populations of menthol-sensitive trigeminal ganglion neurons ( $n = 67$ ) and TRPM8-expressing HEK293 cells ( $n = 641$ ) as a function of temperature. The active population is defined as the fraction of the cells whose apparent temperature threshold exceeds the temperature at that point. The red lines represent the Boltzmann fits to the data and the dashed lines indicate the temperature at which 50% of the population is active.
